# Supplementary material for: Achieving hierarchical hollow carbon@Fe@Fe3O4 nanospheres with superior microwave absorption properties and lightweight features
Source: Royal Society of Chemistry journal article supplement (doi:10.1039/c5tc02512e), 2015-01-01
Supplement: c5tc02512e1.pdf [file c5tc02512e1.pdf]

## Electronic Supplementary Information

### **Achieving Hierarchical hollow carbon@Fe@Fe<sub>3</sub>O<sub>4</sub> nanospheres with superior microwave absorption properties and lightweight feature**

Hualiang Lv <sup>a</sup>, Guangbin Ji <sup>a,\*</sup>, Wei Liu <sup>a</sup>, Haiqian Zhang <sup>a</sup> and Youwei Du <sup>b</sup>

<sup>a</sup> *College of Material Science and Technology, Nanjing University of Aeronautics and  
Astronautics, Nanjing 210016, Peoples Republic of China*

<sup>b</sup> *Laboratory of Solid State Microstructures, Nanjing University, Nanjing 210093,  
Peoples Republic of China*

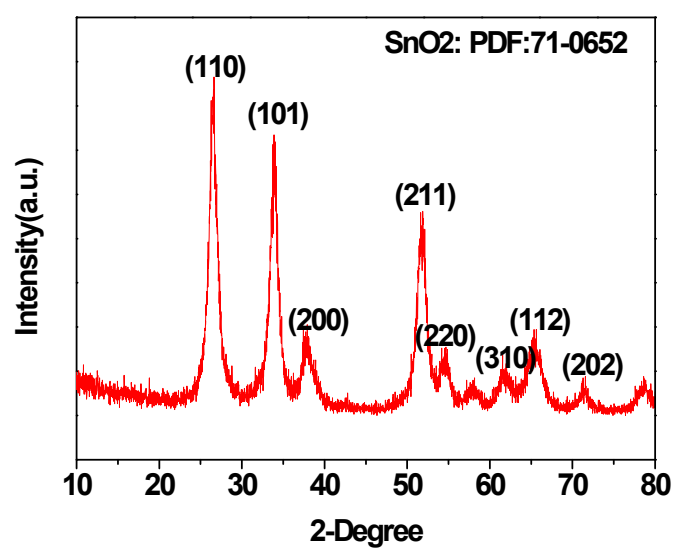

Figure S1. The XRD pattern of the as-prepared SnO<sub>2</sub>.

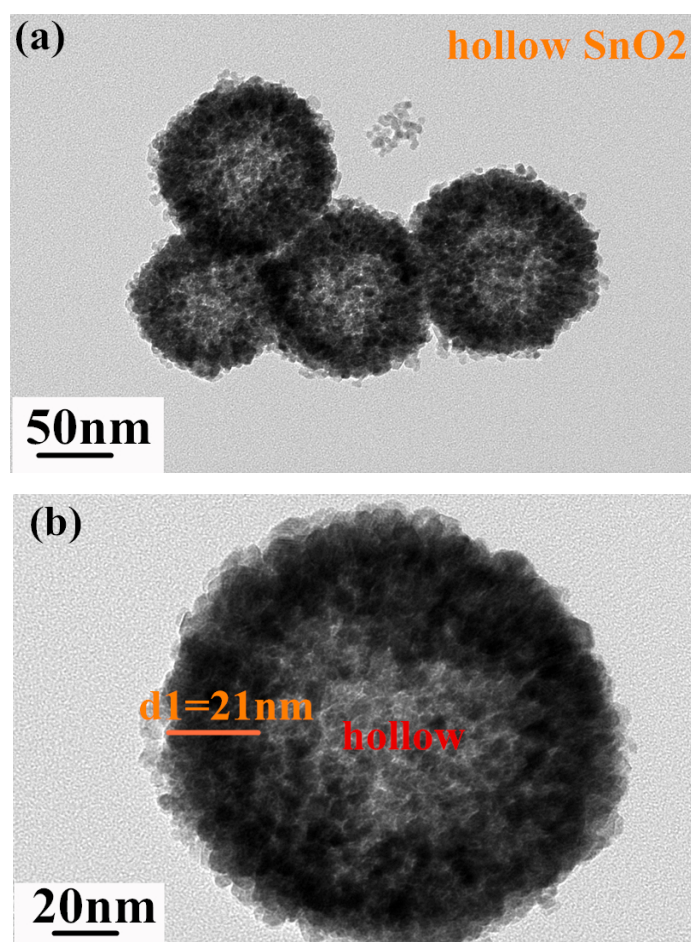

Figure S2. The TEM images of the hollow SnO<sub>2</sub>.

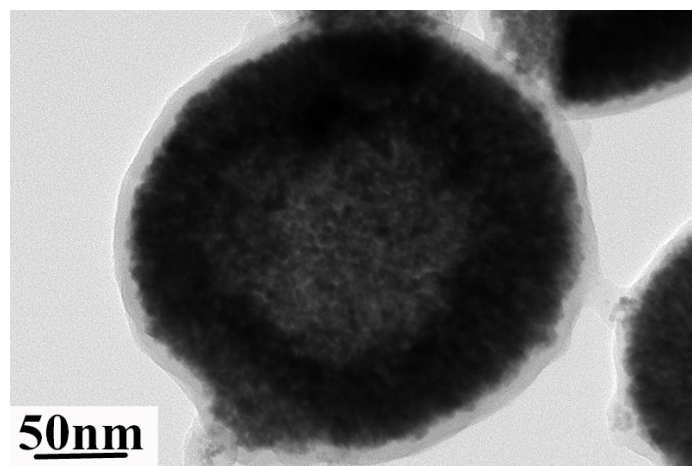

**Figure S3.** The TEM image of carbon@SnO<sub>2</sub>.

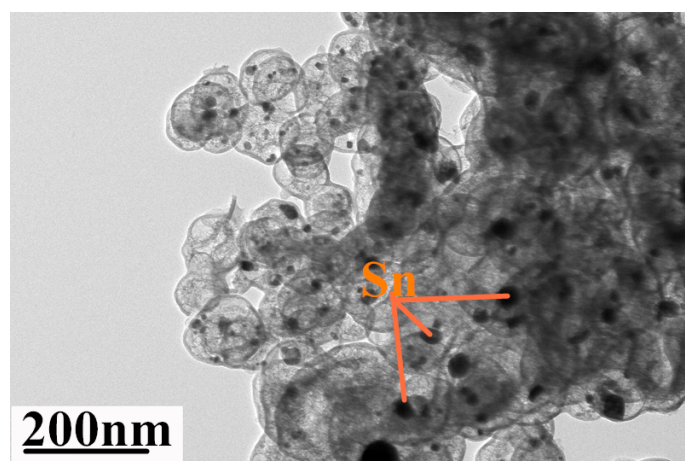

**Figure S4.** The TEM image of residual Sn after a short time of HCl treatment.

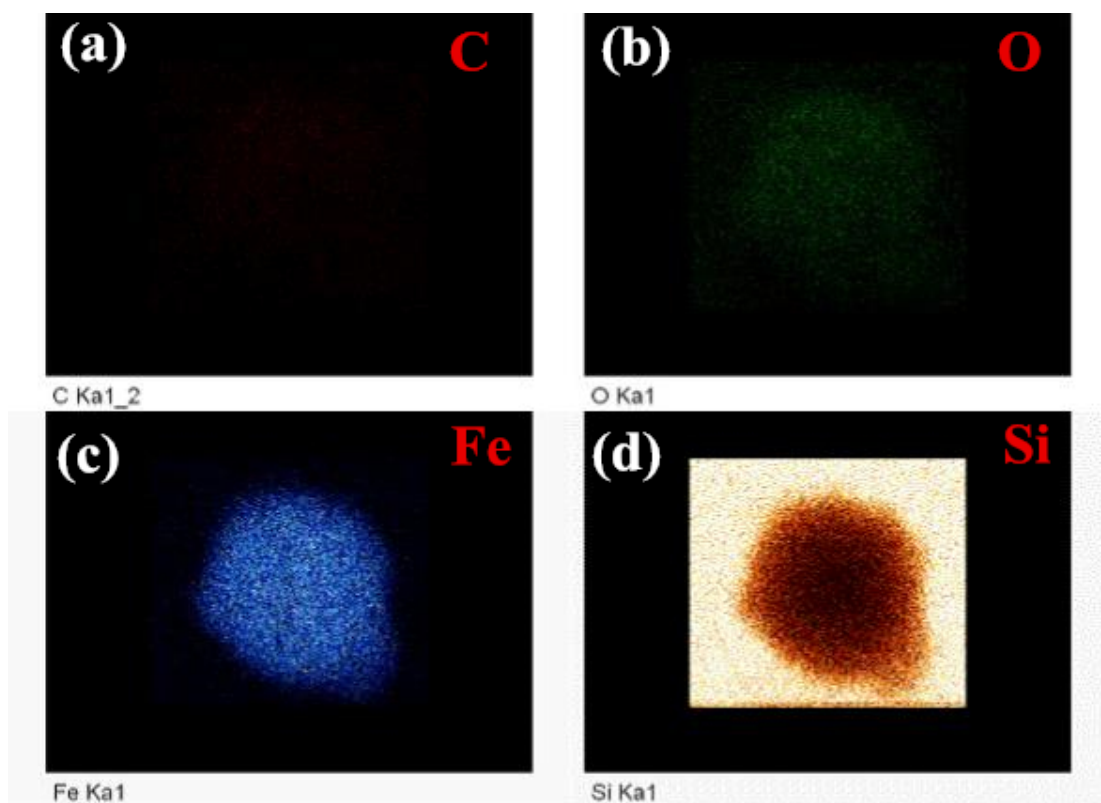

**Figure S5.** The element mapping of typical carbon@Fe@Fe<sub>3</sub>O<sub>4</sub> nanospheres. (a) C (b) O (c) Fe (d) Si.
